# Supplementary material for: N6-methyladenosine demethylases Alkbh5/Fto regulate cerebral ischemia-reperfusion injury
Source: PubMed Central journal article supplement — Ther Adv Chronic Dis. 2020 Apr 29;11:2040622320916024. doi: 10.1177/2040622320916024 (PMC7222229; doi:10.1177/2040622320916024), 2020-04-29
Supplement: Supplementary.pdf [file Supplementary.pdf]

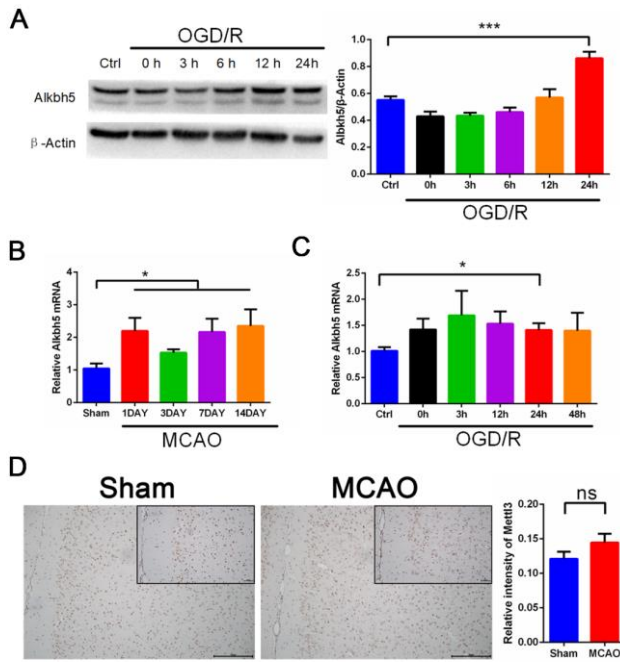

**Supplementary Figure 1** The levels of other demethylases and methyltransferases in rat cerebral cortex after MCAO. (A) Representative images of Western blots of OGD/R treated primary neurons. Alkhh5 levels were determined by Western blot (mean  $\pm$  SEM;  $n \geq 3$ ; \*\*\*  $P < 0.001$  vs. Ctrl). (B) qRT-PCR images of MCAO treated rat cerebral cortex. Alkhh5 levels were analyzed by qRT-PCR (mean  $\pm$  SEM;  $n = 3$ ; \*  $P < 0.05$  vs. sham). (C) qRT-PCR images of OGD/R treated primary neurons. Alkhh5 levels were analyzed by qRT-PCR (mean  $\pm$  SEM;  $n \geq 3$ ; \*  $P < 0.05$  vs. Ctrl). (D) Immunohistochemical results of Mettl3 in rat cerebral cortex in two indicator groups: tawny staining for Mettl3 protein and light blue staining for hematoxylin. Scale bar = 100  $\mu$ m, and the small picture scale bar = 2000  $\mu$ m. Quantification of Mettl3 was shown (mean  $\pm$  SEM;  $n = 3$ ; ns  $P > 0.05$  vs. Sham).

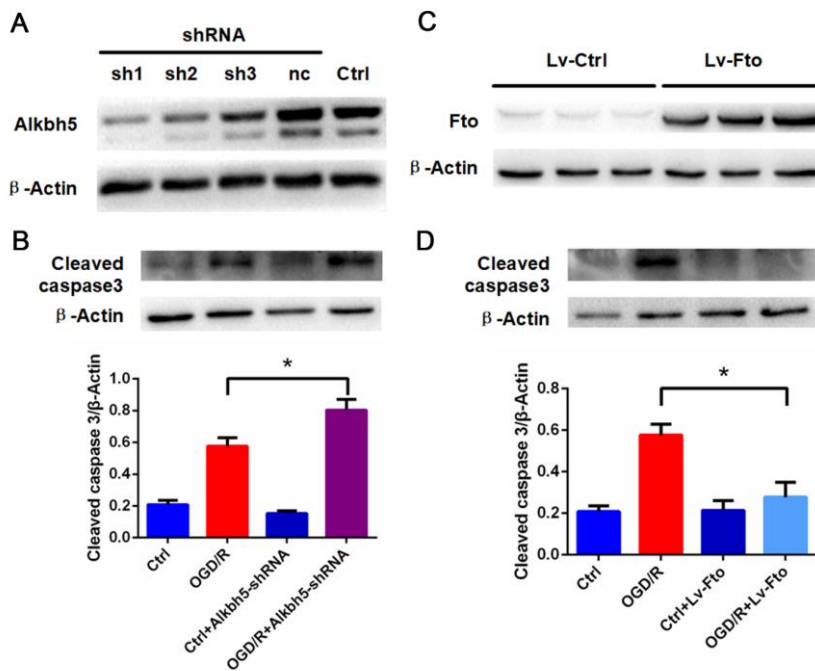

**Supplementary Figure 2.** Alkhh5 knockdown enhanced OGD/R treated primary neuronal apoptosis and Fto overexpression attenuated OGD/R treated primary neuronal apoptosis. (A) Representative images of Western blots of primary neurons infected with Alkhh5-shRNA. Alkhh5 levels were determined by Western blot. Quantification of Alkhh5 protein levels showed a knockdown efficiency of over 70%. (B) Representative

images of Western blots of primary neuron infected with Alkbh5-shRNA. Cleaved-caspase3 levels were determined by Western blot (mean  $\pm$  SEM; n = 3; \* P < 0.05 vs. OGD/R). (C) Representative images of Western blots of primary neurons infected with Lv-Fto. Fto levels were determined by Western blot. (D) Representative images of Western blots of primary neuron infected with Lv-Fto. Cleaved-caspase3 levels were determined by Western blot (mean  $\pm$  SEM; n = 3; \* P < 0.05 vs. OGD/R).

**Supplementary Table 1. The primers used in this study.**

| Primer name |           | Sequence                   |
|-------------|-----------|----------------------------|
| Alkbh5      | Alkbh5 F  | CGGAAGTACCAGGAGGACTCAGAC   |
|             | Alkbh5 R  | GGATGCCGCTCTTCACCTTGC      |
| Fto         | Fto F     | GACCGTCCTGCGATGATGAAGTG    |
|             | Fto R     | CCTGTCCACCAAGTTCTCGTCATG   |
| Mettl3      | Mettl3 F  | CACGCTGCCTCAGATGTTGACC     |
|             | Mettl3 R  | CTGACCTTCTTGCTCTGCTGTTCC   |
| Mettl14     | Mettl14 F | TGAGAGGCTTAGACCGAAGTCACC   |
|             | Mettl14 R | GACCACGGCCAGCAGATGTTC      |
| Bcl2        | Bcl2 F    | CACGGTGGTGGAGGAAGTCT       |
|             | Bcl2 R    | TCCACAGAGCGATGTTGTCC       |
| WTAP        | WTAP F    | AGAACATCCTTGTCATGCGGCTAG   |
|             | WTAP R    | TCGGCTGCTGAACTTGCTTGAG     |
| VIRMA       | VIRMA F   | GGTGCTAAGAGGCTGGTACAAGTCTG |
|             | VIRMA R   | TGGAGGAGGAGGTGGAGGAGAG     |
| RBM15       | RBM15 F   | AGGTTCTGGCAGCGGGGATG       |
|             | RBM15 R   | CGGCTCACATACACGGCTTCTATC   |

**Supplementary Table 2. The reagents used in this study.**

| Reagents                             | Company                  | Catalogue Number |
|--------------------------------------|--------------------------|------------------|
| Neurobasal medium                    | Thermo fisher scientific | 21103-049        |
| B-27 Supplement (50X), serum free    | Thermo fisher scientific | 17504-044        |
| L-Glutamine                          | Thermo fisher scientific | 25030-081        |
| Hanks' Balanced Salt Solution (HBSS) | Thermo fisher scientific | 14170-112        |
| Trypsin-EDTA (0.25%)                 | Thermo fisher scientific | 25200-072        |
| DMEM, no Glucose                     | Thermo fisher scientific | 11966-025        |
| Fetal bovine serum (FBS)             | Thermo fisher scientific | 10099-141        |
| 0.25% Trypsin                        | Thermo fisher scientific | 15050-057        |
| PBS                                  | Thermo fisher scientific | C20012500BT      |
| DMEM, High Glucose                   | Thermo fisher scientific | C11995500BT      |
| Penicillin-Streptomycin              | Thermo fisher scientific | 15140-122        |
| BCA Protein Assay Kit                | Thermo fisher scientific | 23227            |
| West Femto                           | Thermo fisher scientific | 34094            |
| Gold Antifade Mountant with DAPI     | Thermo fisher scientific | P-36931          |
| Polyethylenimine                     | Polysciences             | 23966-1          |
| TEMED                                | Sigma-Aldrich            | T9281            |

|                                   |                        |             |
|-----------------------------------|------------------------|-------------|
| 1-Bromo-3-chloropropane           | Sigma-Aldrich          | B9673       |
| Glycerol                          | Solarbio life sciences | G8190       |
| Tween-20                          | Solarbio life sciences | T8220       |
| DMSO                              | Solarbio life sciences | D8370       |
| RIPA buffer                       | Solarbio life sciences | R0010       |
| Hoechst 33342/PI Double Stain Kit | Solarbio life sciences | CA1120      |
| Protein Phosphatase Inhibitor     | Solarbio life sciences | P1260       |
| 0.01M PBS                         | Solarbio life sciences | P1010       |
| Sodium dodecylsulfate (SDS)       | Solarbio life sciences | S8010       |
| 1.5M Tris-HCl                     | Solarbio life sciences | T1010       |
| 1M Tris-HCl                       | Solarbio life sciences | T1020       |
| Acrylamide                        | Solarbio life sciences | A1010       |
| Poly-L-lysine Solution            | Solarbio life sciences | P2100       |
| Sodium acetate                    | Solarbio life sciences | A1070       |
| Ammonium persulfate substitute    | Beyotime Biotechnology | ST005       |
| SDS-PAGE Sample Loading Buffer    | Beyotime Biotechnology | P0015       |
| Stripping buffer                  | Beyotime Biotechnology | P0025       |
| Skim milk                         | BD                     | 232100      |
| Albumin bovine                    | Generay Biotechnology  | 0332        |
| Paraformaldehyde                  | Macklin                | P804536     |
| Isoflurane                        | RWD life science       | R510-22     |
| Chloral hydrate                   | Meilunbio              | MB4202      |
| WesternBright ECL                 | Advansta               | K-12045-D10 |
| Cell Counting Kit-8 assay kit     | Dojindo                | CK04-500    |
| <i>Eco</i> R I                    | Takara                 | 1611        |
| <i>Xba</i> I                      | Takara                 | 1634        |
| T4 DNA Ligase                     | Takara                 | 2011A       |
| <i>E. coli</i> DH5 $\alpha$       | Takara                 | 9057        |
| Ampicillin                        | Solarbio life sciences | A8180       |
| Plasmid Mini Kit                  | Qiagen                 | 12123       |
| EndoFree Plasmid Maxi Kit         | Qiagen                 | 12362       |
| Agarose                           | Meilunbio              | MB2555      |
| Tryptone                          | Oxoid                  | LP0042      |
| Yeast extract                     | Oxoid                  | LP0021      |
| actinomycin D                     | MedChemExpress         | HY-17559    |
